# Supplementary material for: Testing the predictability of morphological evolution in contrasting thermal environments
Source: bioRxiv or medRxiv preprint supplement (doi:10.1101/609933), 2020-08-14
Supplement: Supplementary file [file media-1.pdf]

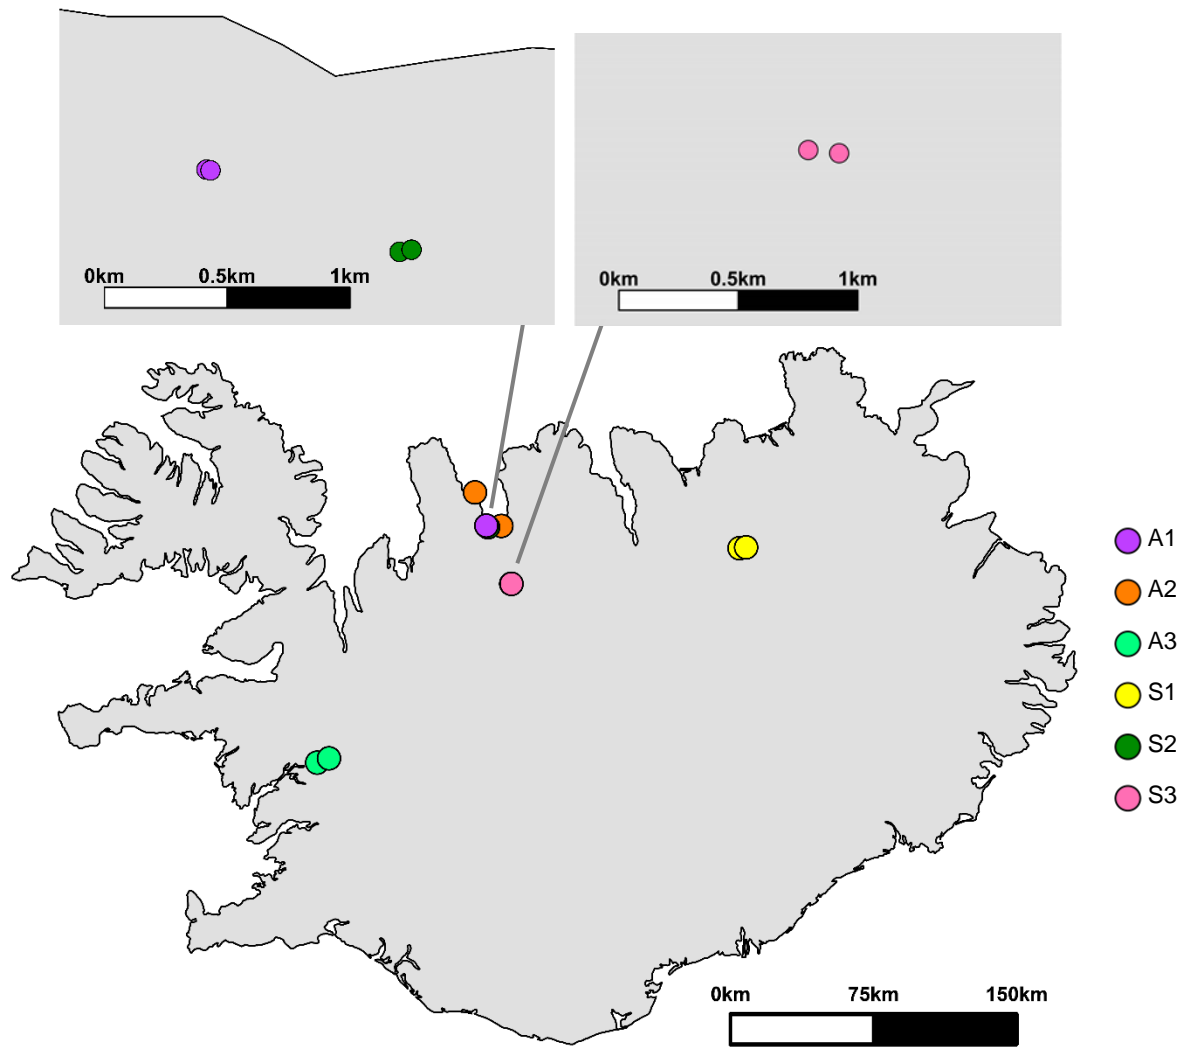

**Figure S1.** Map of Iceland showing the sampling locations of warm- and cold-habitat sticklebacks we collected for this study. Each of our six population pairs is indicated by a different colour.
