# Supplementary material for: Testing the predictability of morphological evolution in contrasting thermal environments
Source: bioRxiv or medRxiv preprint supplement (doi:10.1101/609933), 2020-08-14
Supplement: Supplementary file [file media-2.pdf]

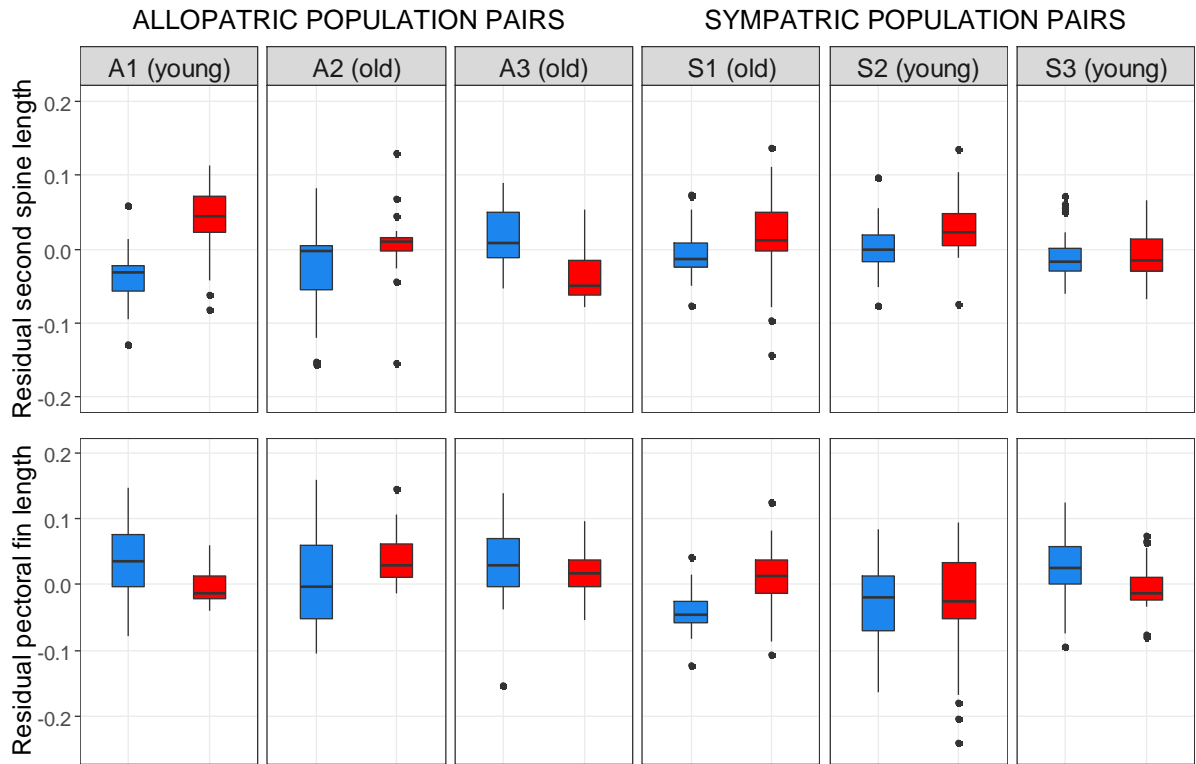

**Figure S2.** Boxplots showing the residuals against centroid size for the second dorsal spine length and pectoral fin length. Filled circles indicate outliers. Specimens from cold and warm habitats are indicated in blue and red, respectively. “Young” or “old” refers to the age of the warm habitat in that population pair.
